# Supplementary material for: Comparative Gene Expression Profiling of P. falciparum Malaria Parasites Exposed to Three Different Histone Deacetylase Inhibitors
Source: PubMed Central journal article supplement (PMC3288058; doi:10.1371/journal.pone.0031847), 2012-02-27
Supplement: pone.0031847.s001.pdf [file pone.0031847.s001.pdf]

**File S1 Number of genes regulated by HDAC inhibitors (>2 fold)**

|                |     | <b>Biological<br/>Replicate</b> | <b>Up-<br/>regulated</b> | <b>Down-<br/>regulated</b> | <b>TOTAL</b> | <b>%</b> |
|----------------|-----|---------------------------------|--------------------------|----------------------------|--------------|----------|
| <b>SAHA</b>    |     |                                 |                          |                            |              |          |
| <b>2h+</b>     | 1   | 403                             | 418                      | 821                        | <b>21</b>    |          |
|                | 2   | 201                             | 174                      | 375                        | <b>10</b>    |          |
|                | 1&2 | 126                             | 73                       | 199                        | <b>5</b>     |          |
| <b>2h+/2h</b>  | 1   | 59                              | 93                       | 152                        | <b>4</b>     |          |
|                | 2   | 121                             | 67                       | 188                        | <b>5</b>     |          |
|                | 1&2 | 12                              | 5                        | 17                         | <b>0.4</b>   |          |
| <b>TSA</b>     |     |                                 |                          |                            |              |          |
| <b>2h+</b>     | 1   | 388                             | 278                      | 666                        | <b>17</b>    |          |
|                | 2   | 234                             | 195                      | 429                        | <b>11</b>    |          |
|                | 1&2 | 141                             | 87                       | 228                        | <b>6</b>     |          |
| <b>2h+/2h-</b> | 1   | 19                              | 63                       | 82                         | <b>2</b>     |          |
|                | 2   | 131                             | 50                       | 181                        | <b>5</b>     |          |
|                | 1&2 | 7                               | 5                        | 12                         | <b>0.3</b>   |          |
| <b>2-ASA-9</b> |     |                                 |                          |                            |              |          |
| <b>2h+</b>     | 1   | 67                              | 11                       | 78                         | <b>2</b>     |          |
|                | 2   | 158                             | 64                       | 222                        | <b>7</b>     |          |
|                | 1&2 | 6                               | 0                        | 6                          | <b>0.2</b>   |          |
| <b>2h+/2h-</b> | 1   | 31                              | 14                       | 45                         | <b>1</b>     |          |
|                | 2   | 114                             | 38                       | 152                        | <b>4</b>     |          |
|                | 1&2 | 11                              | 3                        | 14                         | <b>0.3</b>   |          |
