# Supplementary material for: Comparative Gene Expression Profiling of P. falciparum Malaria Parasites Exposed to Three Different Histone Deacetylase Inhibitors
Source: PubMed Central journal article supplement (PMC3288058; doi:10.1371/journal.pone.0031847), 2012-02-27

**A. SAHA Replicate 1**

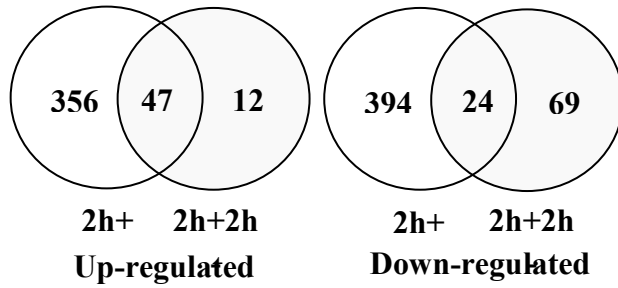

**B. SAHA Replicate 2**

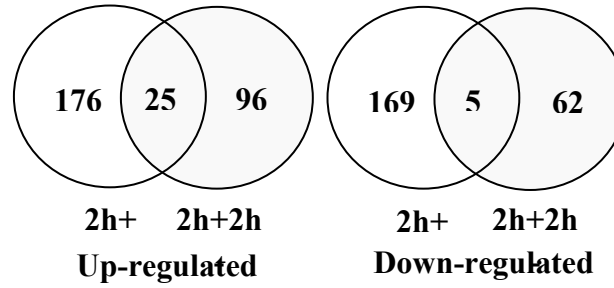

**C. SAHA – Combined Replicate 1 & 2**

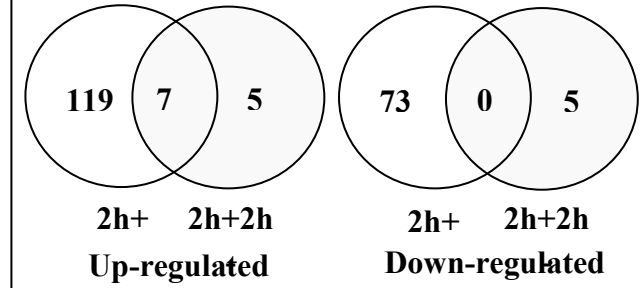

**D. TSA Replicate 1**

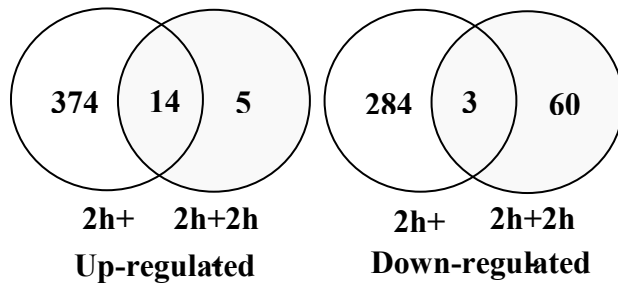

**E. TSA Replicate 2**

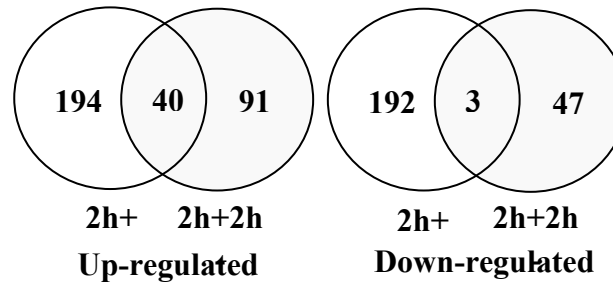

**F. TSA – Combined Replicate 1 & 2**

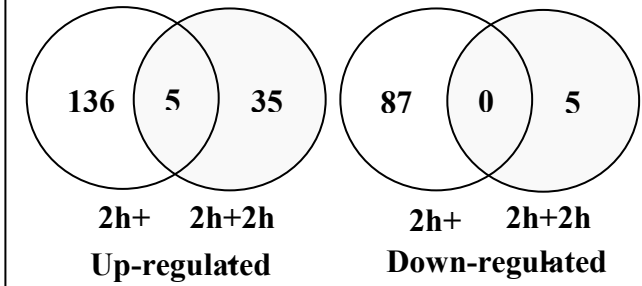

**G. 2-ASA-9 Replicate 1**

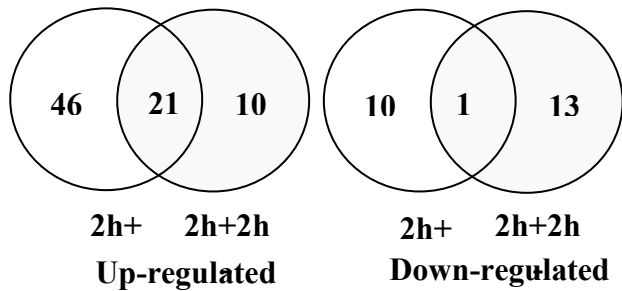

**H. 2-ASA-9 Replicate 2**

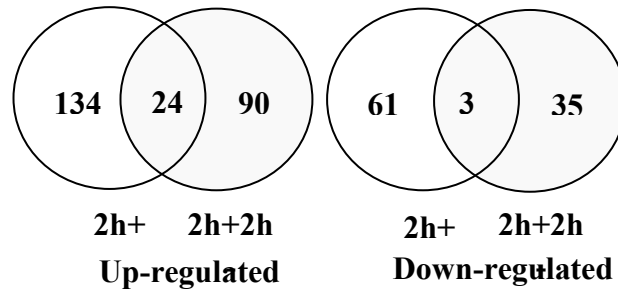

**I. 2-ASA-9 – Combined Replicate 1 & 2**

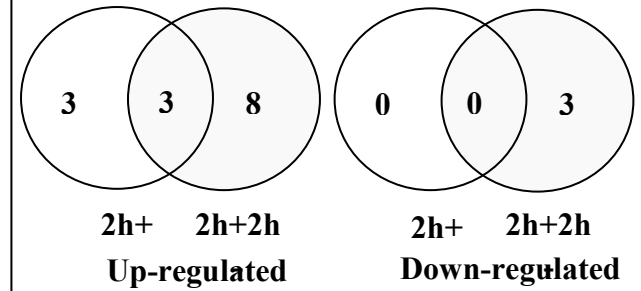

Supplement: pone.0031847.s002.pdf [file pone.0031847.s002.pdf]
