# Supplementary material for: Comparative Gene Expression Profiling of P. falciparum Malaria Parasites Exposed to Three Different Histone Deacetylase Inhibitors
Source: PubMed Central journal article supplement (PMC3288058; doi:10.1371/journal.pone.0031847), 2012-02-27

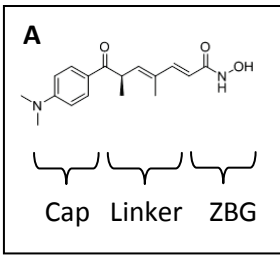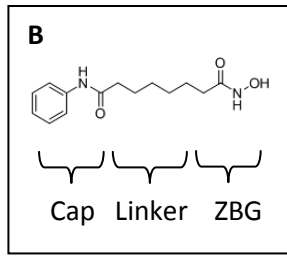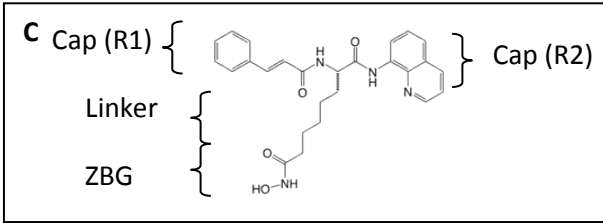

Supplement: pone.0031847.s008.pdf [file pone.0031847.s008.pdf]
